# Supplementary material for: Pt–MoO3–RGO ternary hybrid hollow nanorod arrays as high-performance catalysts for methanol electrooxidation
Source: Royal Society of Chemistry journal article supplement (doi:10.1039/c5ta08585c), 2016-01-01
Supplement: c5ta08585c1.pdf [file c5ta08585c1.pdf]

---

## Supporting Information

# Pt-MoO<sub>3</sub>-RGO Ternary Hybrid Hollow Nanorod Arrays as High-Performance Catalysts for Methanol Electrooxidation

An-Liang Wang,<sup>†</sup> Chao-Lun Liang,<sup>‡</sup> Xue-Feng Lu,<sup>†</sup> Ye-Xiang Tong,<sup>†</sup> and Gao-Ren Li<sup>\*,†</sup>

<sup>†</sup>*MOE Laboratory of Bioinorganic and Synthetic Chemistry, KLGHEI of Environment and Energy Chemistry, School of Chemistry and Chemical Engineering, Sun Yat-sen University, Guangzhou 510275, China*

<sup>‡</sup>*Instrumental Analysis and Research Centre, Sun Yat-Sen University, Guangzhou 510275, China*

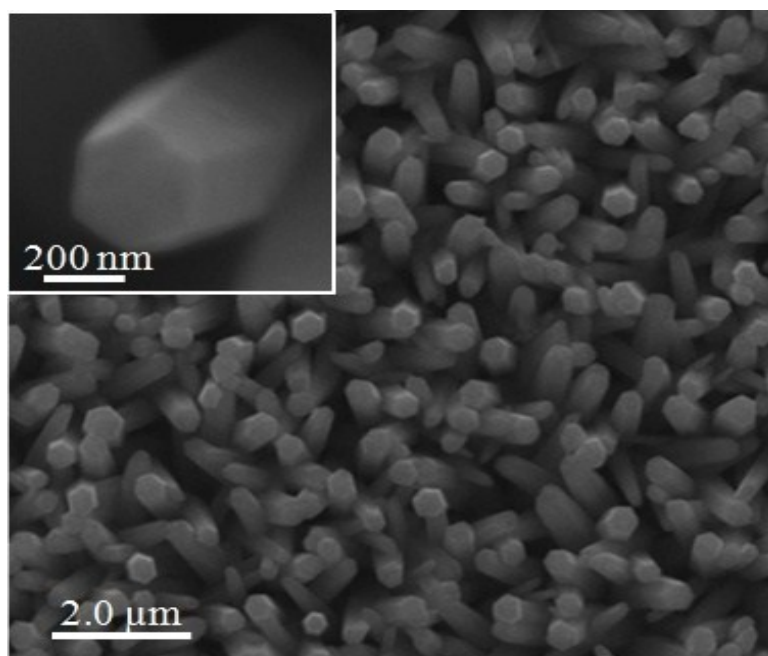

**Figure S1.** SEM image of ZnO NRAs.

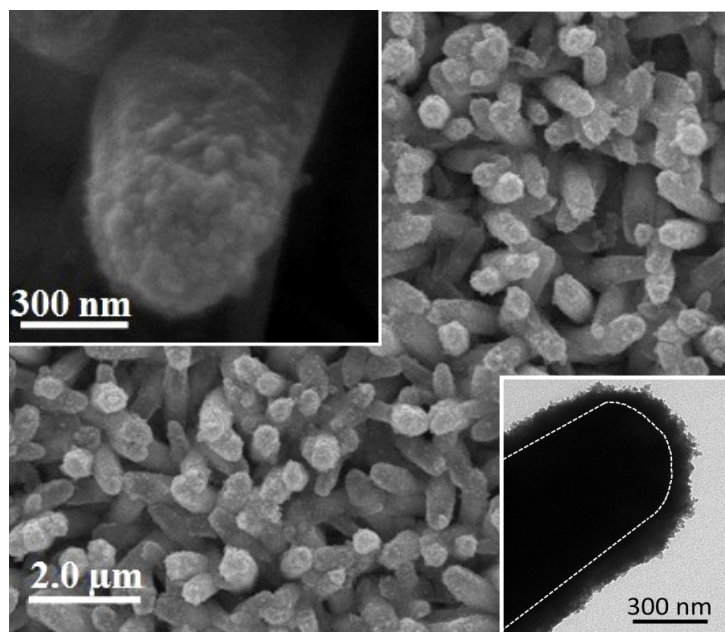

**Figure S2.** SEM image of ZnO@MoO<sub>3</sub>-Pt-RGO composite NRAs. (The core-shell structure of ZnO@MoO<sub>3</sub>-Pt-RGO NRAs is characterized by the TEM shown in inset).

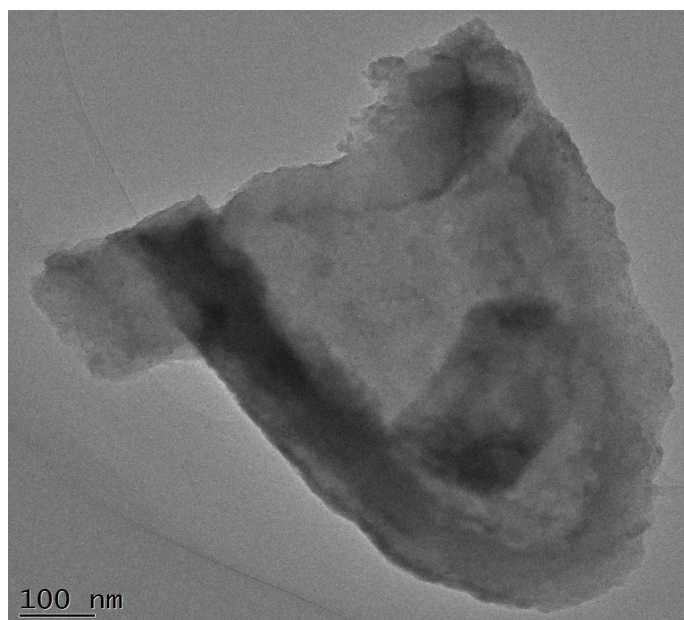

**Figure S3.** TEM image of a broken MoO<sub>3</sub>-Pt-RGO hollow nanorod.

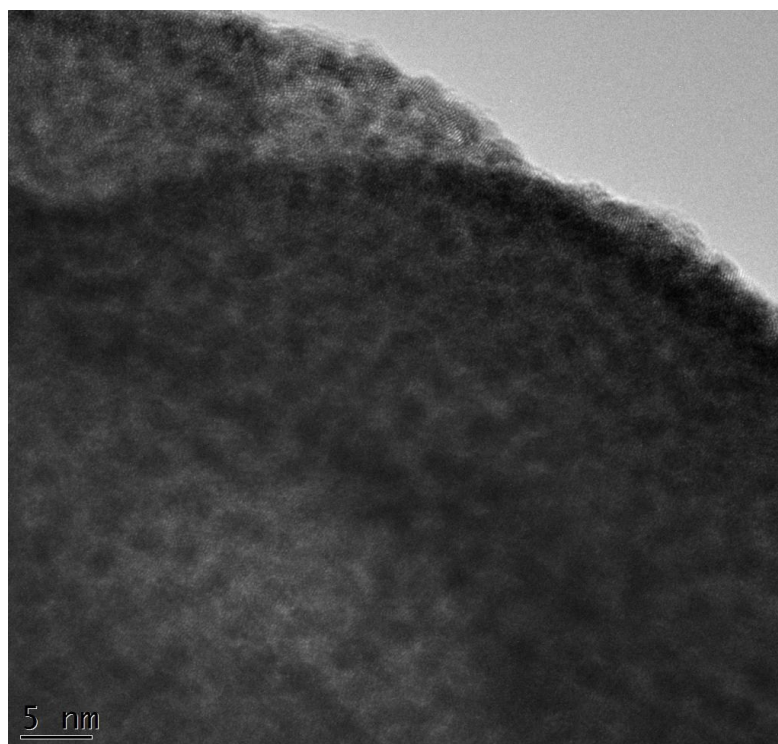

**Figure S4.** TEM image of high dispersive Pt nanocrystals in the walls of Pt-MoO<sub>3</sub>-RGO HNRA.

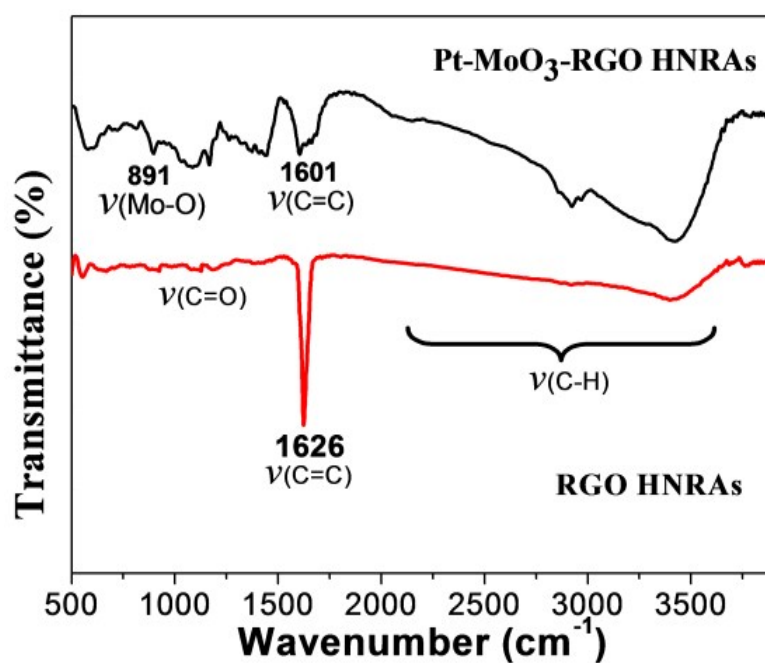

**Figure S5.** IR spectra measured on Pt-MoO<sub>3</sub>-RGO HNRA (black) and RGO HNRA (red).

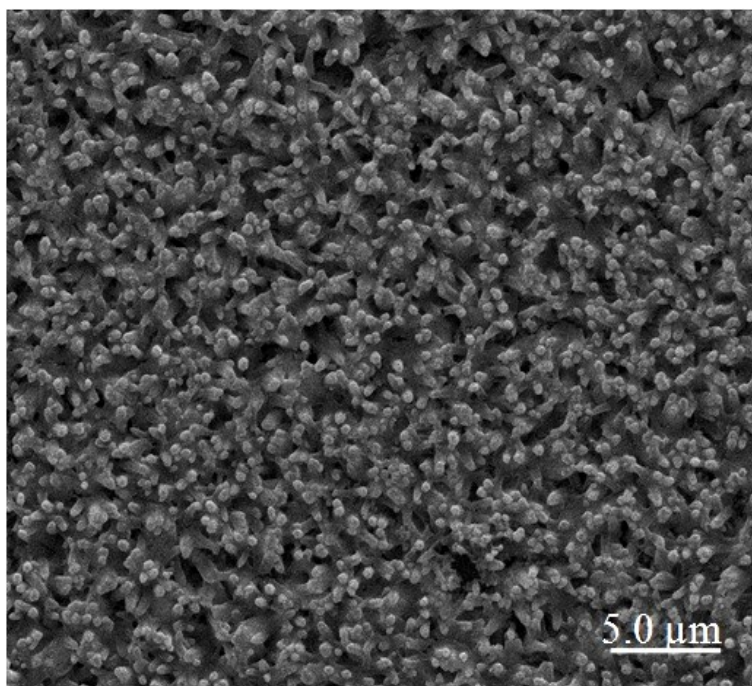

**Figure S6.** SEM image of Pt-MoO<sub>3</sub> hybrid HNRAAs.

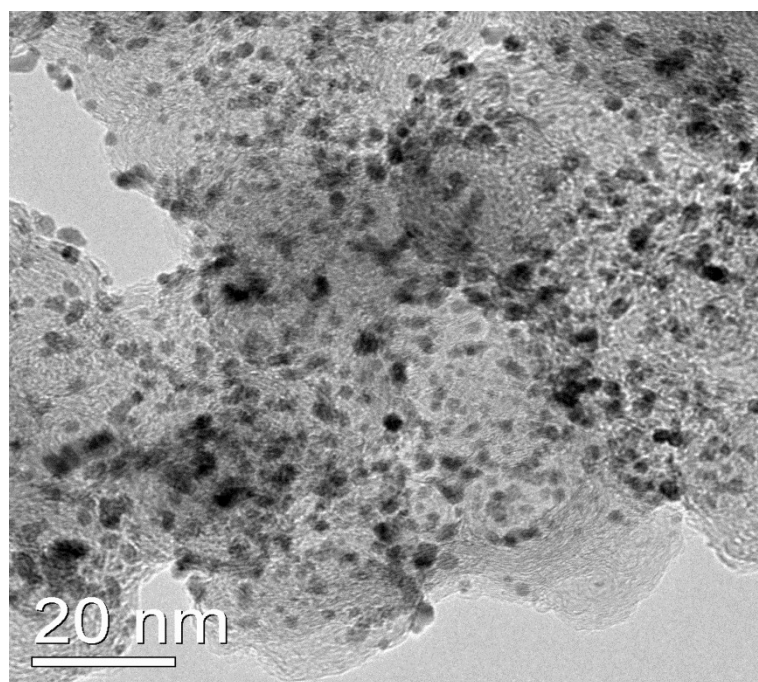

**Figure S7.** TEM image of commercial Pt/C catalysts.



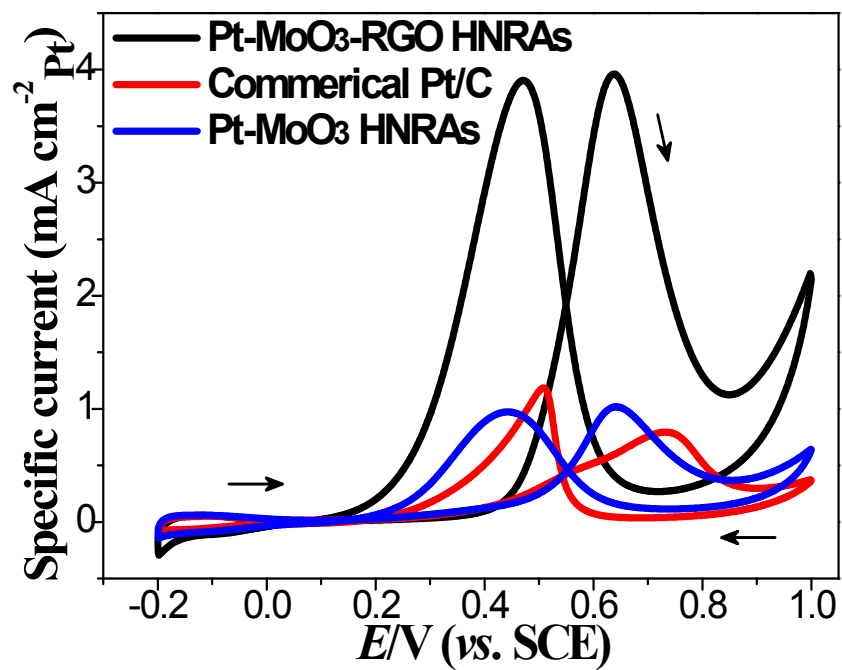

**Figure S8.** CVs of catalysts measured in 0.5 M  $\text{CH}_3\text{OH} + 0.5 \text{ M H}_2\text{SO}_4$  solution at 50 mV/s with specific current density of ECSA.

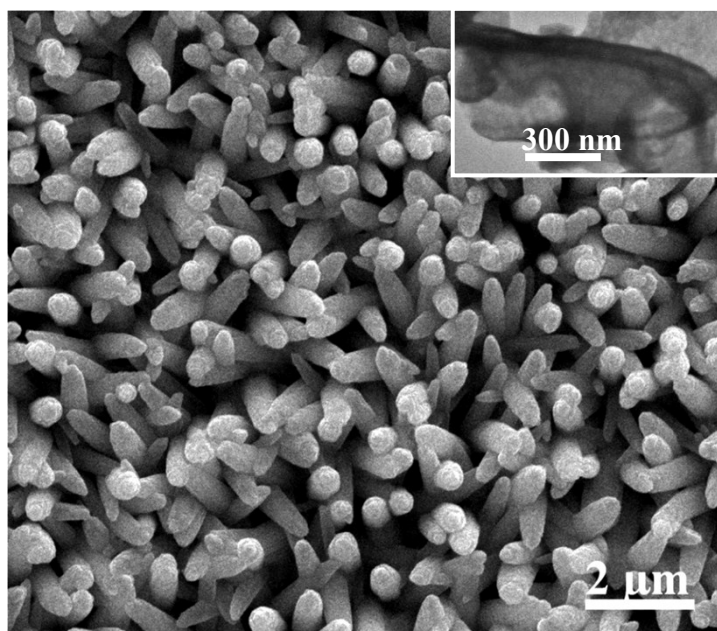

**Figure S9.** SEM image of Pt-MoO<sub>3</sub>-RGO HNRAs after 200 cycles.

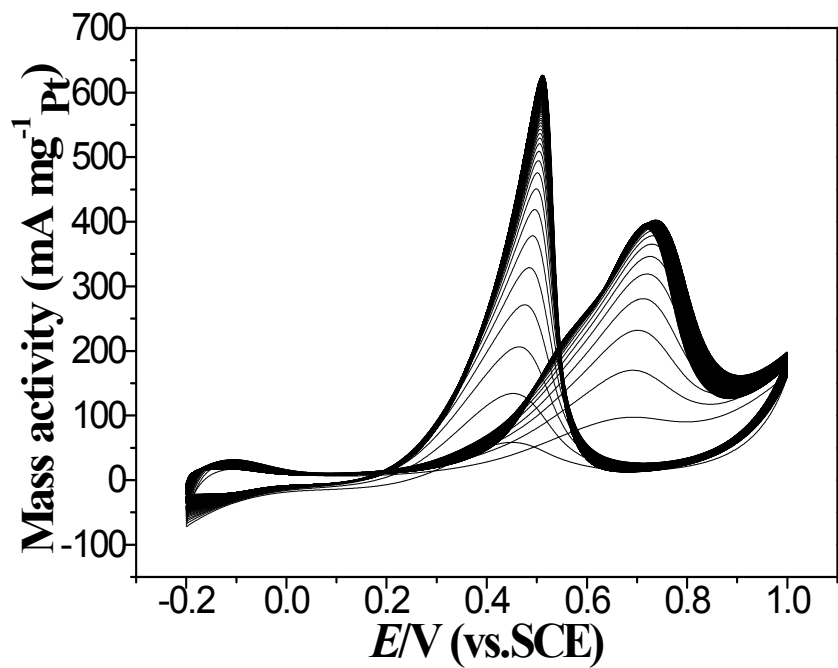

Figure S10. CVs of commercial Pt/C catalysts from 1st to 200th cycle.

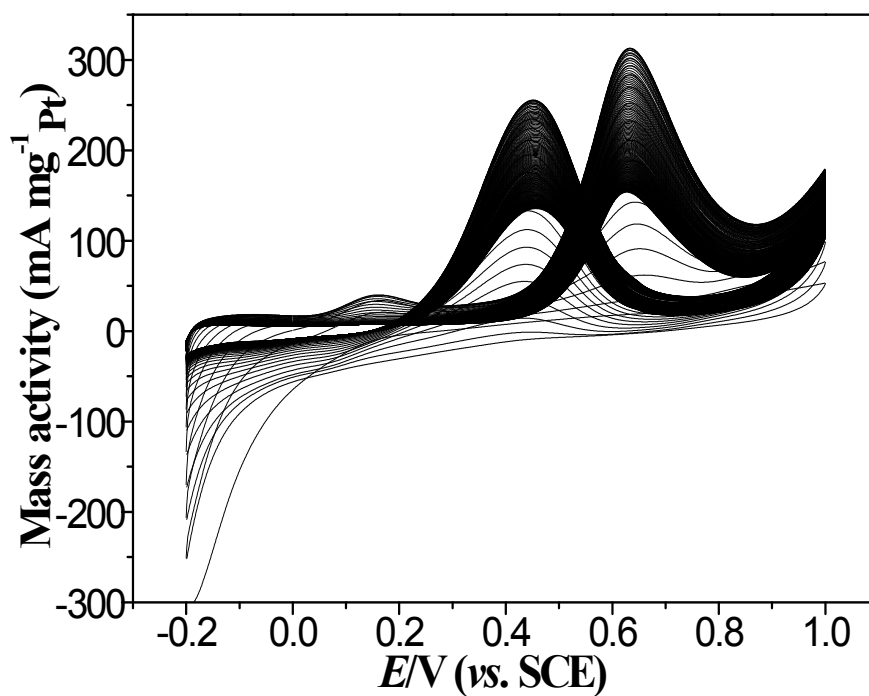

Figure S11. CVs of Pt-MoO<sub>3</sub> HNRA catalysts from 1st to 200th cycle.

**Table S 1.** Mass activity comparisons of Ni@Pt@Ni@Pt NTAs with other Pt-based electrocatalysts.

| Electrocatalyst                                                             | Mass current density (mA /g) | Testing solution                                                  | Reference        |
|-----------------------------------------------------------------------------|------------------------------|-------------------------------------------------------------------|------------------|
| <b>Pt-MoO<sub>3</sub>-RGO NTAs</b>                                          | <b>809.5</b>                 | <b>0.5 M H<sub>2</sub>SO<sub>4</sub> + 0.5 M CH<sub>3</sub>OH</b> | <b>This work</b> |
| Pt <sub>0.75</sub> (RuO <sub>2</sub> -MoO <sub>3</sub> ) <sub>0.25</sub> /C | 31                           | 0.5 M H <sub>2</sub> SO <sub>4</sub> + 0.5 M CH <sub>3</sub> OH   | 1                |
| Pt-MoO <sub>x</sub> (10%)-MWCNT                                             | 46.58                        | 0.5 M H <sub>2</sub> SO <sub>4</sub> + 0.5 M CH <sub>3</sub> OH   | 2                |
| Pt-MoO <sub>x</sub> /CNTs                                                   | 250                          | 0.5 M H <sub>2</sub> SO <sub>4</sub> + 1.0 M CH <sub>3</sub> OH   | 3                |
| PtRu(7:3)/MWCNTs                                                            | 115                          | 0.5 M H <sub>2</sub> SO <sub>4</sub> + 1.0 M CH <sub>3</sub> OH   | 4                |
| Hollow mesoporous Pt-Ni nanospheres                                         | 380                          | 0.5 M H <sub>2</sub> SO <sub>4</sub> + 0.5 M CH <sub>3</sub> OH   | 5                |
| PVP-Modified Graphite Carbon Nanofibers/PtRu                                | 234                          | 1.0 M H <sub>2</sub> SO <sub>4</sub> + 0.5 M CH <sub>3</sub> OH   | 6                |
| PtPd/RGO                                                                    | 198                          | 0.1 M HClO <sub>4</sub> + 1.0 M CH <sub>3</sub> OH                | 7                |
| PtRu/graphene                                                               | 339.2                        | 0.5 M H <sub>2</sub> SO <sub>4</sub> + 1.0 M CH <sub>3</sub> OH   | 8                |
| Pt hollow nanocrystal /graphene                                             | 218                          | 0.5 M H <sub>2</sub> SO <sub>4</sub> + 0.5 M CH <sub>3</sub> OH   | 9                |
| PtRu/MC                                                                     | 19.8                         | 0.5 M H <sub>2</sub> SO <sub>4</sub> + 1.0 M CH <sub>3</sub> OH   | 10               |
| PtRu/graphene                                                               | 205.7                        | 0.5 M H <sub>2</sub> SO <sub>4</sub> + 1.0 M CH <sub>3</sub> OH   | 11               |
| Pt/MC/graphene                                                              | 81.6                         | 0.5 M H <sub>2</sub> SO <sub>4</sub> + 0.5 M CH <sub>3</sub> OH   | 12               |
| Pt/N-doped C                                                                | 103                          | 0.5 M H <sub>2</sub> SO <sub>4</sub> + 1.0 M CH <sub>3</sub> OH   | 13               |
| Pt/Sn-modified CNT                                                          | 91.0                         | 0.5 M H <sub>2</sub> SO <sub>4</sub> + 1.0 M CH <sub>3</sub> OH   | 14               |
| Pt/TiO <sub>2</sub> /C                                                      | 102.8                        | 0.5 M H <sub>2</sub> SO <sub>4</sub> + 0.5 M CH <sub>3</sub> OH   | 15               |
| PtRu/HPAs-CS/graphene                                                       | 232                          | 0.5 M H <sub>2</sub> SO <sub>4</sub> + 1.0 M CH <sub>3</sub> OH   | 16               |
| Pt MTNN                                                                     | 580.97                       | 0.5 M H <sub>2</sub> SO <sub>4</sub> + 1.0 M CH <sub>3</sub> OH   | 17               |
| FePtPd Nanowires                                                            | 488.7                        | 0.1 M HClO <sub>4</sub> + 0.2 M CH <sub>3</sub> OH                | 18               |
| Pt-on-Pd Bimetallic Nanodendrites                                           | 490                          | 0.5 M H <sub>2</sub> SO <sub>4</sub> + 1.0 M CH <sub>3</sub> OH   | 19               |
| Ni@Pt@Ni@Pt NTAs                                                            | 362.7                        | 0.5 M H <sub>2</sub> SO <sub>4</sub> + 0.5 M CH <sub>3</sub> OH   | 20               |

## Reference

- (1) M. K. Jeon, K. R. Lee and S. I. Woo, *Korean. J. Chem. Eng.*, 2009, **26**, 1028-1033.
- (2) R. Vellacheri, S. M. Unni, S. Nahire, U. K. Kharul and S. Kurungot, *Electrochim. Acta.*, 2010, **55**, 2878-2887.
- (3) Z. M. Cui, S. P. Jiang and C. M. Li, *Chem. Commun.*, 2011, **47**, 8418-8420.
- (4) J. Prabhuram, T. Zhao, Z. Tang, R. Chen and Z. Liang, *J. Phys. Chem. B*, 2006, **110**, 5245-5252.
- (5) Y. Hu, P. Wu, H. Zhang and C. Cai, *Electrochim. Acta.*, 2012, **85**, 314-321.
- (6) Y. L. Hsin, K. C. Hwang and C.-T. Yeh, *J. Am. Chem. Soc.*, 2007, **129**, 9999-10010.
- (7) Y. Lu, Y. Jiang, H. Wu and W. Chen, *J. Phys. Chem. C*, 2013, **117**, 2926-2938.
- (8) Z. Bo, D. Hu, J. Kong, J. Yan and K. Cen, *J. Power. Sources.*, 2015, **273**, 530-537.
- (9) Y.-P. Xiao, S. Wan, X. Zhang, J.-S. Hu, Z.-D. Wei and L.-J. Wan, *Chem. Commun.*, 2012, **48**, 10331-10333.
- (10) J. Qi, L. Jiang, Q. Tang, S. Zhu, S. Wang, B. Yi and G. Sun, *Carbon*, 2012, **50**, 2824-2831.
- (11) J. Zhao, L. Zhang, H. Xue, Z. Wang and H. Hu, *RSC Adv.*, 2012, **2**, 9651-9659.
- (12) X. Bo and L. Guo, *Electrochim. Acta.*, 2013, **90**, 283-290.
- (13) C. Pan, L. Qiu, Y. Peng and F. Yan, *J. Mater. Chem.*, 2012, **22**, 13578-13584.
- (14) S. Sun, G. Zhang, D. Geng, Y. Chen, M. N. Banis, R. Li, M. Cai and X. Sun, *Chem-Eur. J.*, 2010, **16**, 829-835.
- (15) Y. Fan, Z. Yang, P. Huang, X. Zhang and Y.-M. Liu, *Electrochim. Acta.*, 2013, **105**, 157-161.
- (16) Z. Cui, C. M. Li and S. P. Jiang, *Phys. Chem. Chem. Phys.*, 2011, **13**, 16349-16357.
- (17) L. Ruan, E. Zhu, Y. Chen, Z. Lin, X. Huang, X. Duan and Y. Huang, *Angew. Chem., Int. Ed.*, 2013, **52**, 12577-12581.
- (18) S. Guo, S. Zhang, X. Sun and S. Sun, *J. Am. Chem. Soc.*, 2011, **133**, 15354-15357.
- (19) L. Wang, Y. Nemoto and Y. Yamauchi, *J. Am. Chem. Soc.*, 2011, **133**, 9674-9677.
- (20) S.-H. Ye, J. Feng, A.-L. Wang, H. Xu and G.-R. Li, *J. Mater. Chem. A*, 2015.
